# Supplementary material for: Non-Alcohol Hand Sanitiser Gels with Mandelic Acid and Essential Oils
Source: MDPI journal article supplement (doi:10.3390/ijms24043855), 2023-02-14
Supplement: s1 [file s1]

Supplementary material to

# Non-Alcohol Hand Sanitiser Gels with Mandelic Acid and Essential Oils

Pavlaína Egner<sup>1</sup>, Jana Pavlačková<sup>1</sup>, Jana Sedlaříková<sup>1</sup>, Pavel Pleva<sup>2</sup>, Pavel Mokrejš<sup>3</sup>, Magda Janalíková<sup>2</sup>

<sup>1</sup>Department of Fat, Surfactant and Cosmetics Technology, Faculty of Technology, Tomas Bata University in Zlín, Vavrečkova 275, 760 01 Zlín, Czech Republic

<sup>2</sup>Department of Environmental Protection Engineering, Faculty of Technology, Tomas Bata University in Zlín, Vavrečkova 275, 760 01 Zlín, Czech Republic

<sup>3</sup>Department of Polymer Engineering, Faculty of Technology, Tomas Bata University in Zlín, Vavrečkova 275, 760 01 Zlín, Czech Republic

In this supplementary material, the following figures and tables are presented:

**Figure S1.** The pH and viscosity measured in time for GCLEO and GCLEO/MA (a), GLEO and GLEO/MA (b), GTEO and GTEO/MA (c) gels.

**Table S1.** Antimicrobial effect against Gram-negative bacteria (*E. coli*), Gram-positive bacteria (*S. aureus*) and yeasts (*C. albicans*) during GCLEO/MA, GLEO/MA, and GTEO/MA storage at three temperatures ( $22 \pm 1$  °C,  $37 \pm 1$  °C, and  $50 \pm 1$  °C).

**Table S2.** The chemical composition of used EOs (Nobilis Tilia, Czech Republic).

(a)

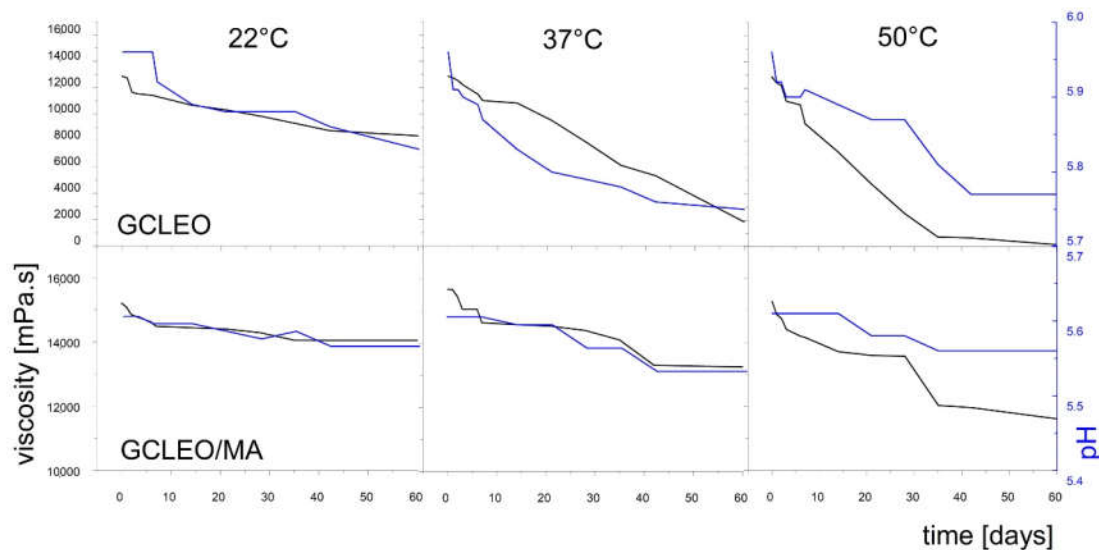

(b)

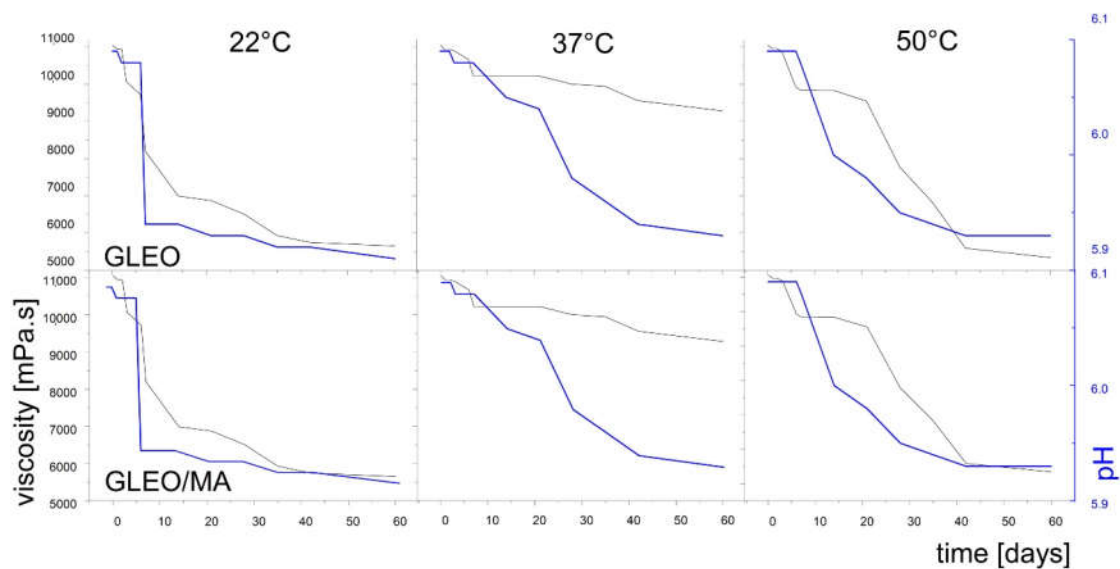

(c)

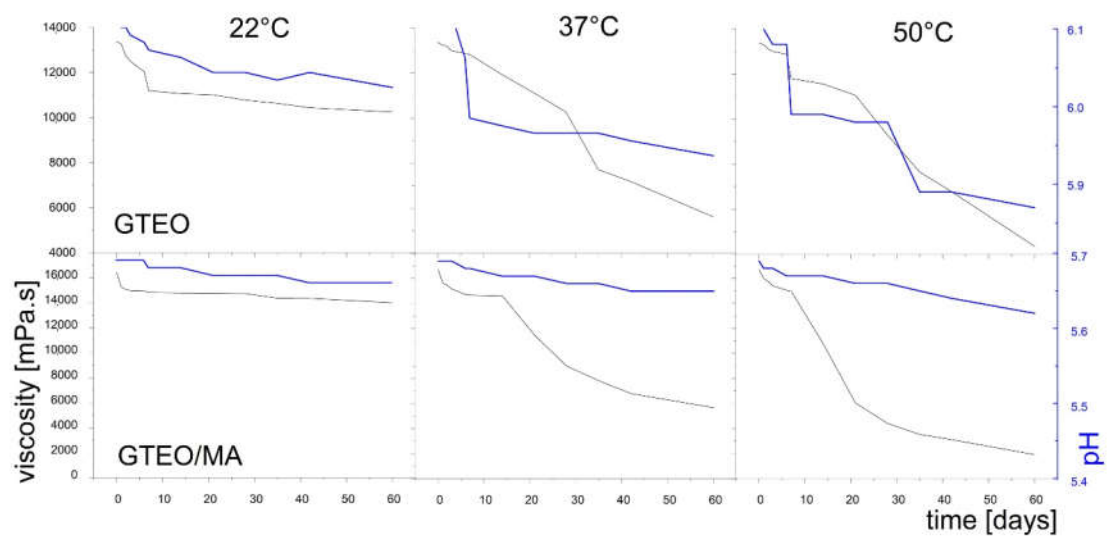

**Figure S1.** The pH values and viscosity measured in time for GCLEO and GCLEO+MA (a), GLEO and GLEO+MA (b), GTEO and GTEO+MA (c) gels.

**Table S1.** Antimicrobial activity (well diameter 6 mm) against Gram-negative bacteria (*E. coli*), Gram-positive bacteria (*S. aureus*) and yeasts (*C. albicans*) during GCLEO/MA, GLEO/MA, and GTEO/MA storage at three temperatures ( $22 \pm 1$  °C,  $37 \pm 1$  °C, and  $50 \pm 1$  °C).

|          |         | Inhibition zone [mm] |    |    |                  |    |    |                    |    |    |
|----------|---------|----------------------|----|----|------------------|----|----|--------------------|----|----|
|          |         | <i>E. coli</i>       |    |    | <i>S. aureus</i> |    |    | <i>C. albicans</i> |    |    |
|          | °C /Day | 0                    | 28 | 60 | 0                | 28 | 60 | 0                  | 28 | 60 |
| GCLEO/MA | 22      | 10                   | 9  | 8  | 10               | 9  | 7  | 24                 | 18 | 9  |
|          | 37      | 10                   | 8  | 6  | 10               | 6  | 6  | 24                 | 9  | 6  |
|          | 50      | 10                   | 7  | 6  | 10               | 6  | 6  | 24                 | 6  | 6  |
| GTEO/MA  | 22      | 12                   | 11 | 10 | 11               | 10 | 8  | 27                 | 23 | 13 |
|          | 37      | 12                   | 9  | 7  | 11               | 9  | 7  | 27                 | 14 | 6  |
|          | 50      | 12                   | 8  | 7  | 11               | 8  | 6  | 27                 | 8  | 6  |
| GLEO/MA  | 22      | 8                    | 6  | 6  | 8                | 6  | 6  | 8                  | 8  | 6  |
|          | 37      | 8                    | 6  | 6  | 8                | 6  | 6  | 8                  | 6  | 6  |
|          | 50      | 8                    | 6  | 6  | 8                | 6  | 6  | 8                  | 6  | 6  |

**Table S2.** The chemical composition of used EOs (Nobilis Tilia, Czech Republic).

| Component             | Content in EO (%) |           |           |           |
|-----------------------|-------------------|-----------|-----------|-----------|
|                       | Cinnamon          | Clove     | Lemon     | Thyme     |
| Coumarin              | 6.0–8.0           | –         | –         | –         |
| Limonene              | < 9.0             | –         | 54.0–74.0 | –         |
| Methoxycinnamaldehyde | < 5.0             | –         | –         | –         |
| (E)-Cinnamaldehyde    | 42.0–70.0         | –         | –         | –         |
| B-Caryophyllene       | –                 | 2.0–12.0  | –         | –         |
| Eugenol               | –                 | 36.0–95.0 | –         | –         |
| Eugenyl Acetate       | –                 | 11.0–22.0 | –         | –         |
| $\beta$ -Pinene       | –                 | –         | < 18.0    | –         |
| $\gamma$ -Terpinene   | –                 | –         | 2.9–14.0  | 1.0–5.0   |
| Geranial              | –                 | –         | < 2.5     | –         |
| p-Cymene              | –                 | –         | 0.3–1.1   | 20.0–30.0 |
| Carvacrol             | –                 | –         | –         | 1.0–3.0   |
| Linalool              | –                 | –         | –         | 1.0–5.0   |
| Myrcen                | –                 | –         | –         | 1.0–5.0   |
| Terpin-1-en-4-ol      | –                 | –         | –         | 1.0–5.0   |
| Thymol                | –                 | –         | –         | 40.0–60.0 |
